# Supplementary material
Source: MDPI journal article supplement (https://www.mdpi.com/2077-0472/13/12/2191)
Supplement: s1 [file s1]

## Supplemental Figures

For Parker et al., “Opportunities to breed diverse sweetpotato varieties for California organic production”.

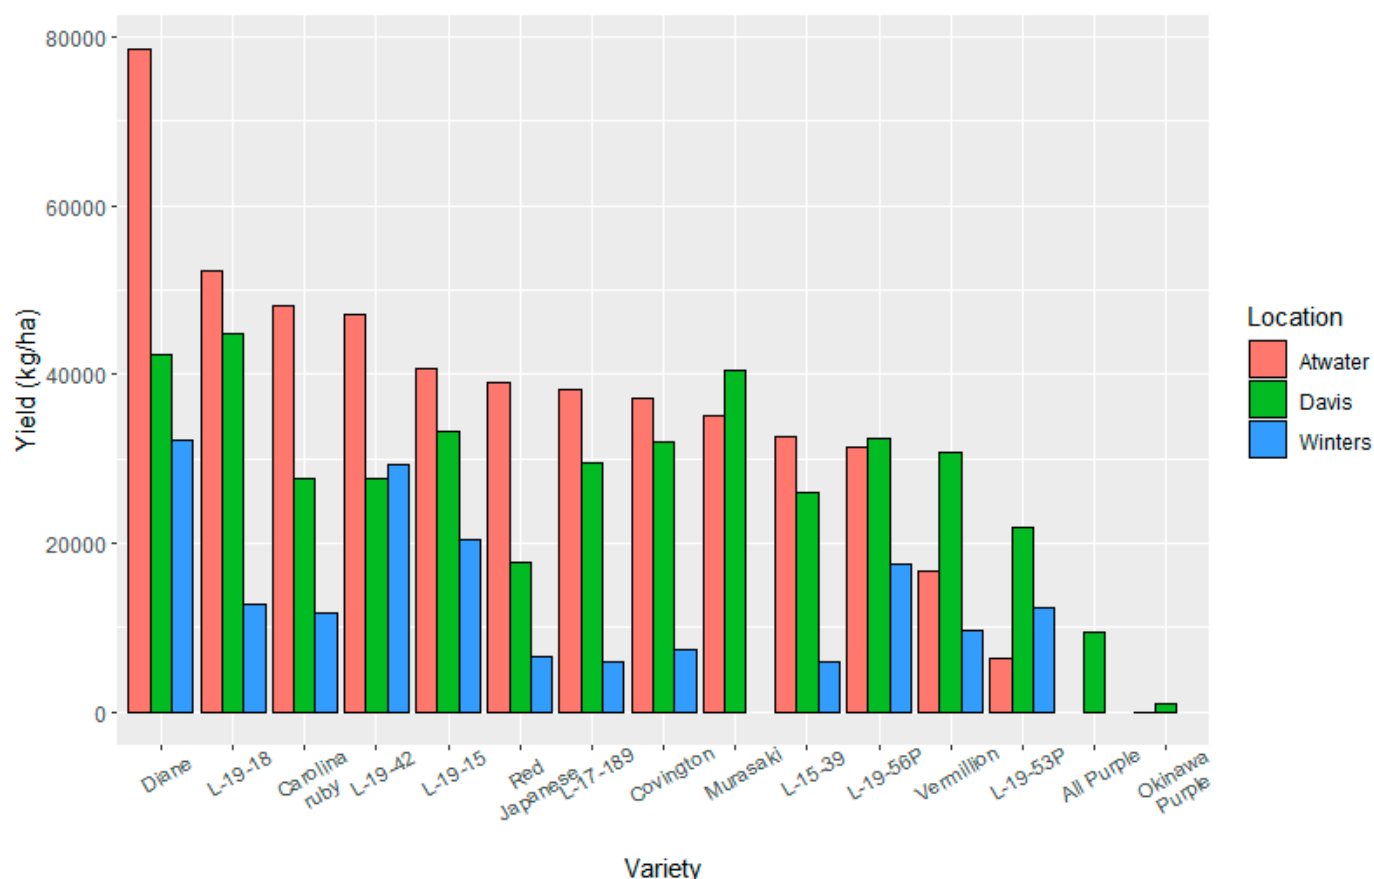

**Supplemental Figure S1.** Yield of 15 focal varieties and breeding lines across three certified organic farms, including twelve replicated types and three unreplicated types. Varieties preferred by the AAPI community, particularly All Purple and Okinawa Purple, had low yields relative to major commercial orange-fleshed varieties such as Diane. These results show that a major opportunity for plant breeding exists, to combine AAPI-preferred culinary traits with greater agronomic productivity and economic accessibility. The highest mean yields were achieved at the location in Merced County, which is the commercial production center for the state. The sandy soils in this location also led to reduced scarring and root damage during harvest compared to the other locations.

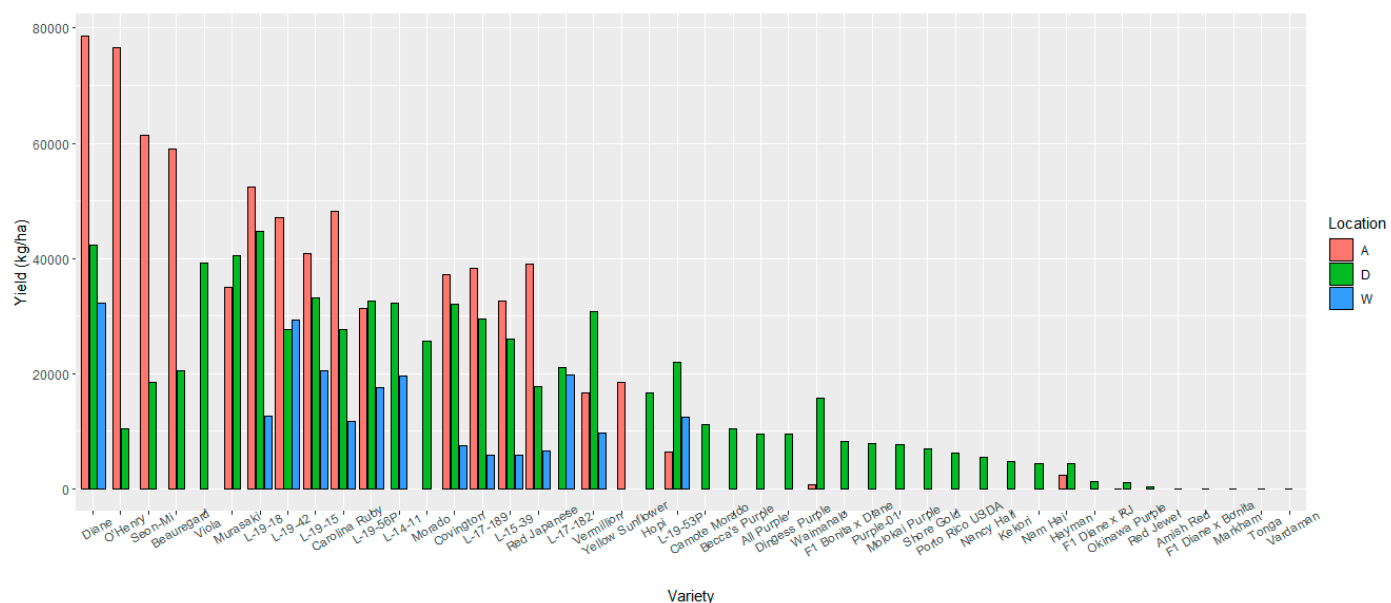

**Supplemental Figure S2.** Yield data of all sweetpotato lines and varieties tested across locations.

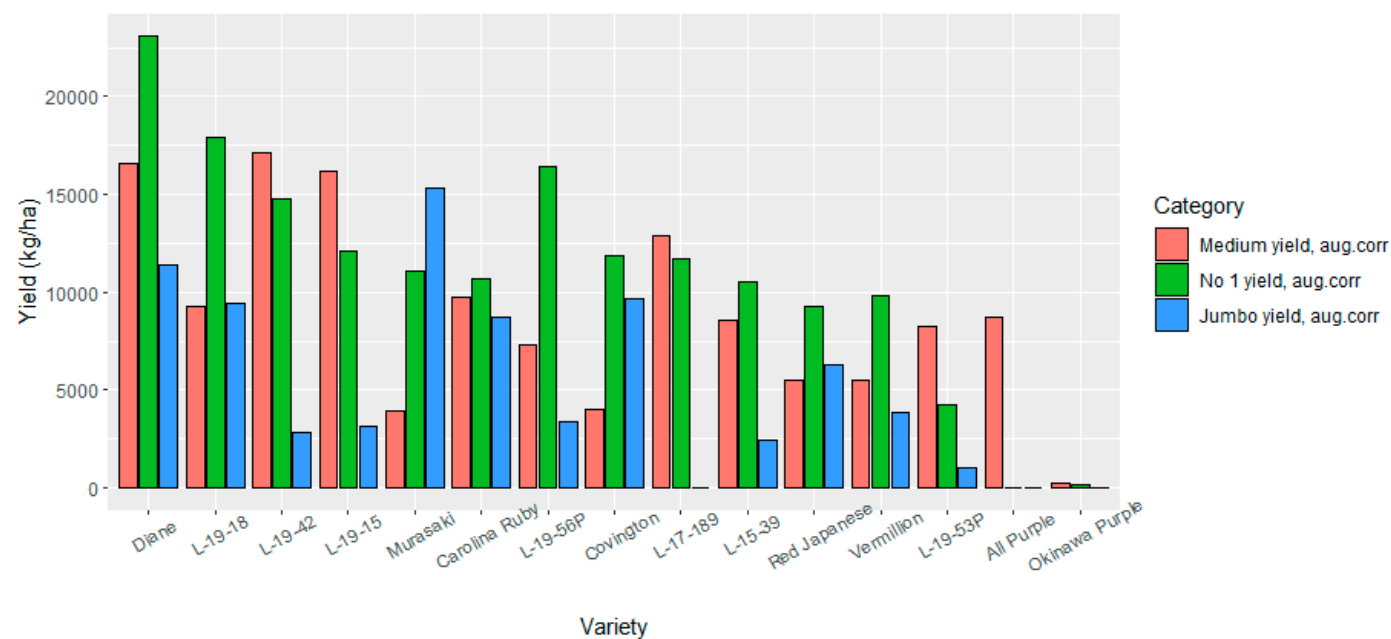

**Supplemental Figure S3.** Yield of 15 focal sweetpotato lines and varieties by size category. The No. 1 size category has the highest value per unit weight. Yield data for the varieties not grown at all sites (Murasaki, All Purple, and Okinawa Purple) represents data corrected for augmented design.

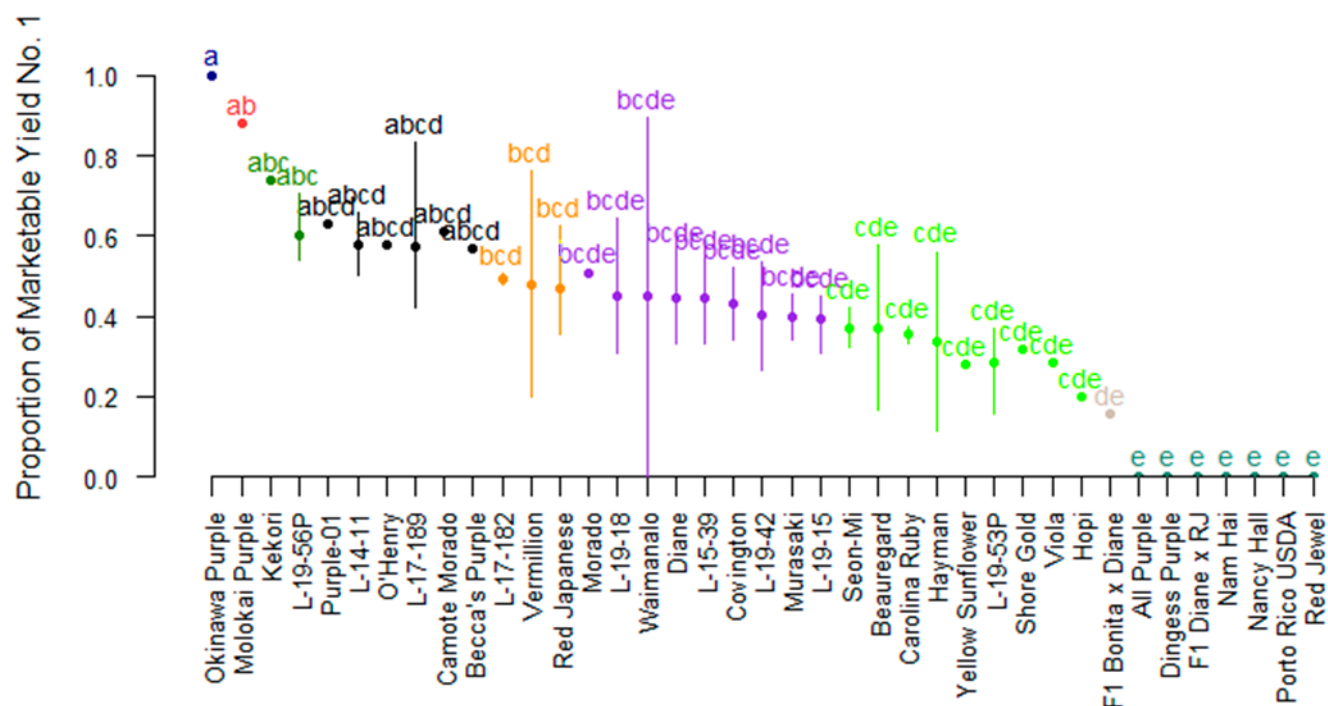

**Supplemental Figure S4:** Proportion of sweetpotato marketable yield in the No. 1 size category, by variety or line.
